# Supplementary material for: Broad near-ultraviolet and blue excitation band induced dazzling red emissions in Eu3+-activated Gd2MoO6 phosphors for white light-emitting diodes
Source: Royal Society of Chemistry journal article supplement (doi:10.1039/c6ra25652j), 2017-01-01
Supplement: c6ra25652j1.pdf [file c6ra25652j1.pdf]

# Broad near-ultraviolet and blue excitation band induced dazzling red emissions in Eu<sup>3+</sup>-activated Gd<sub>2</sub>MoO<sub>6</sub> phosphors for white light-emitting diodes

Peng Du<sup>a</sup>, Yue Guo<sup>b</sup>, Soo Hyun Lee<sup>a</sup> and Jae Su Yu<sup>a\*</sup>

<sup>a</sup>Department of Electronics and Radio Engineering, Kyung Hee University, Yongin 446-701, Republic of Korea

<sup>b</sup>Department of Physics, Pukyong National University, Busan 608-737, Republic of Korea.

\* Corresponding author:

E-mail address: jsyu@khu.ac.kr

Tel: 82 31 201 3820

Fax: 82 31 206 2820

**Table S1.** Structural parameters of Gd<sub>2</sub>MoO<sub>6</sub>:0.30Eu<sup>3+</sup> nanophosphors based on the Rietveld XRD refinement.

| Sample                 | Gd <sub>2</sub> MoO <sub>6</sub> :0.30Eu <sup>3+</sup> |
|------------------------|--------------------------------------------------------|
| Phase structure        | Monoclinic                                             |
| Space group            | I2/a(15)                                               |
| <i>a</i>               | 15.68645 (Å)                                           |
| <i>b</i>               | 11.18177 (Å)                                           |
| <i>c</i>               | 5.41992 (Å)                                            |
| <i>V</i>               | 950.55 (Å <sup>3</sup> )                               |
| <i>R</i> <sub>p</sub>  | 5.31%                                                  |
| <i>R</i> <sub>wp</sub> | 4.22%                                                  |
| $\chi^2$               | 1.47                                                   |

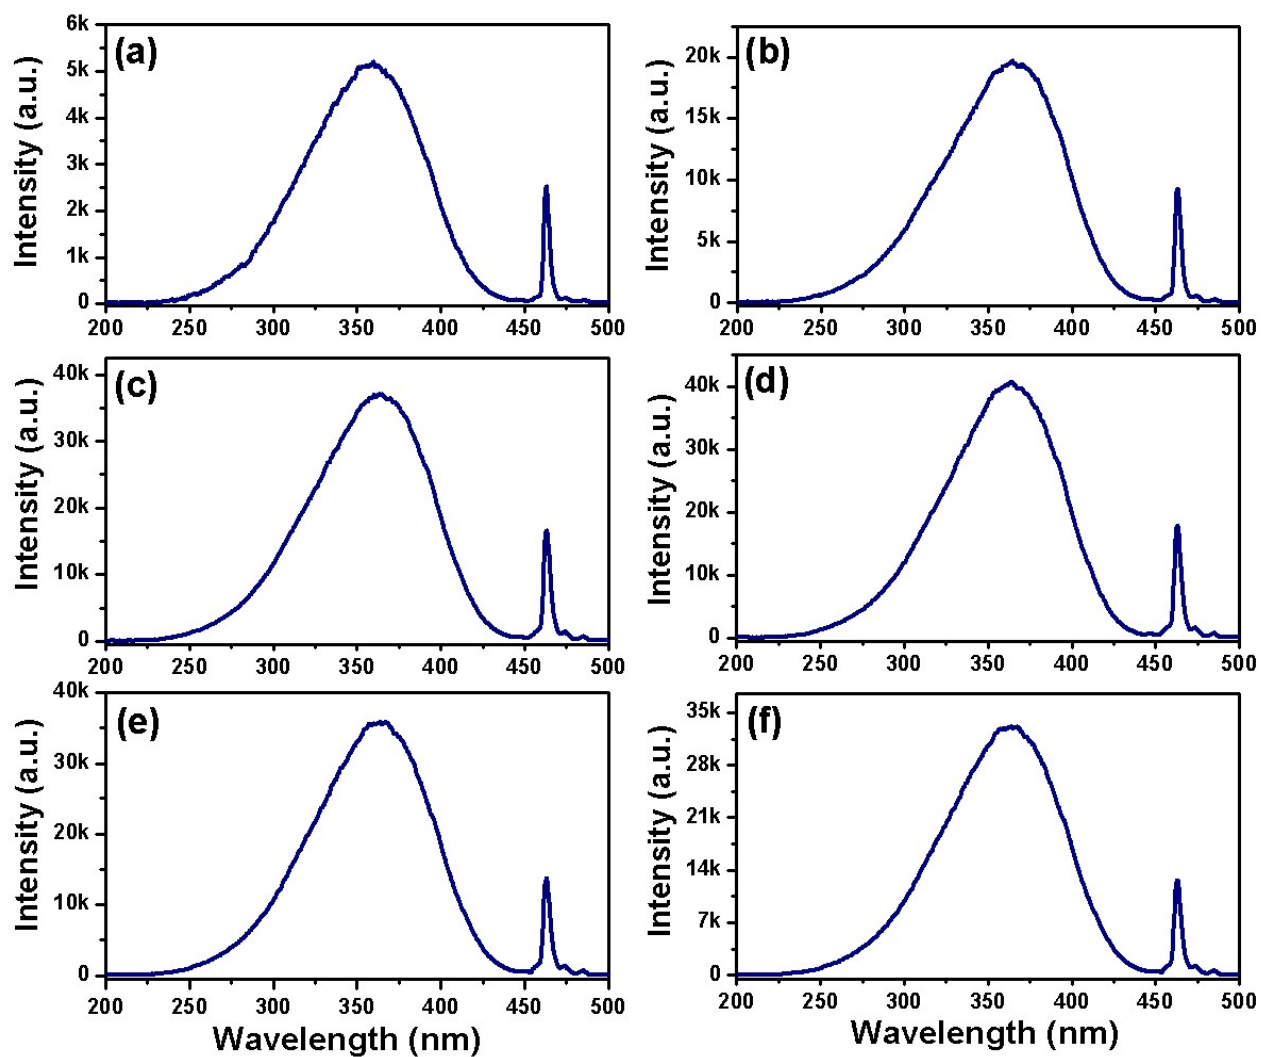

**Figure S1.** PLE spectra of  $\text{Gd}_2\text{MoO}_6:2x\text{Eu}^{3+}$  (a)  $x = 0.01$ , (b)  $x = 0.05$ , (c)  $x = 0.10$ , (d)  $x = 0.15$ , (e)  $x = 0.20$  and (f)  $x = 0.30$  phosphors monitored at 610 nm.

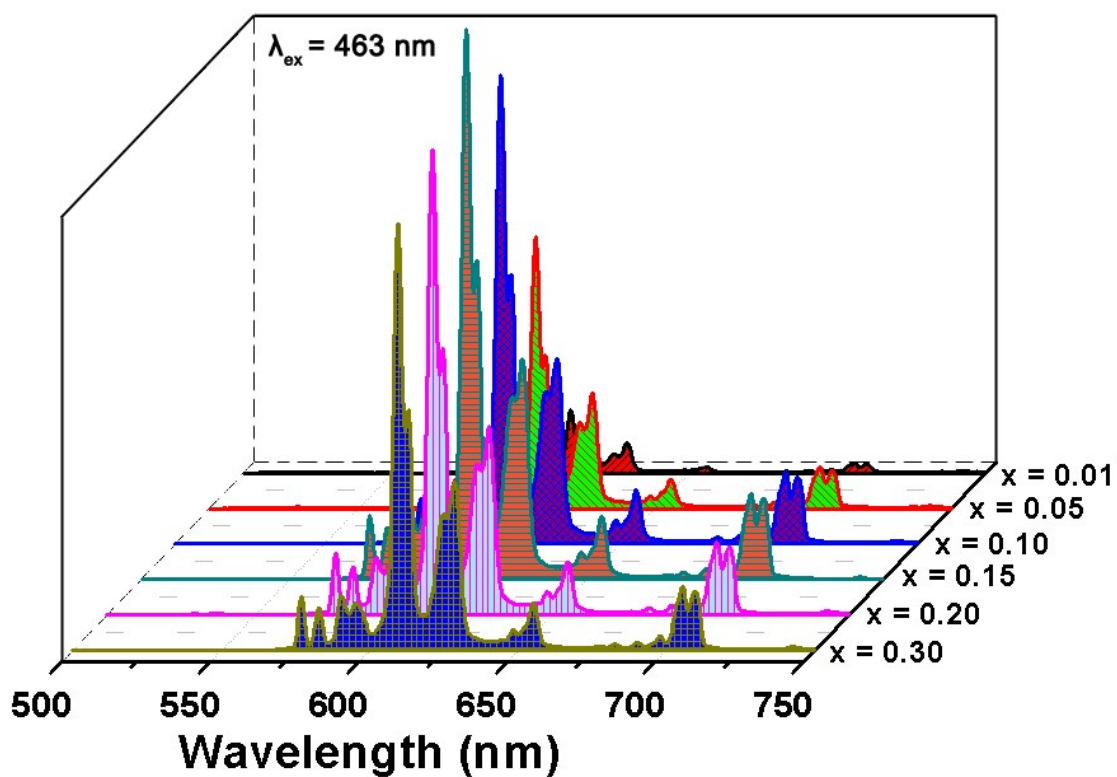

**Figure S2.** PL spectra of Eu<sup>3+</sup>-activated Gd<sub>2</sub>MoO<sub>6</sub> phosphors as a function of Eu<sup>3+</sup> ion concentration upon 463 nm light excitation.

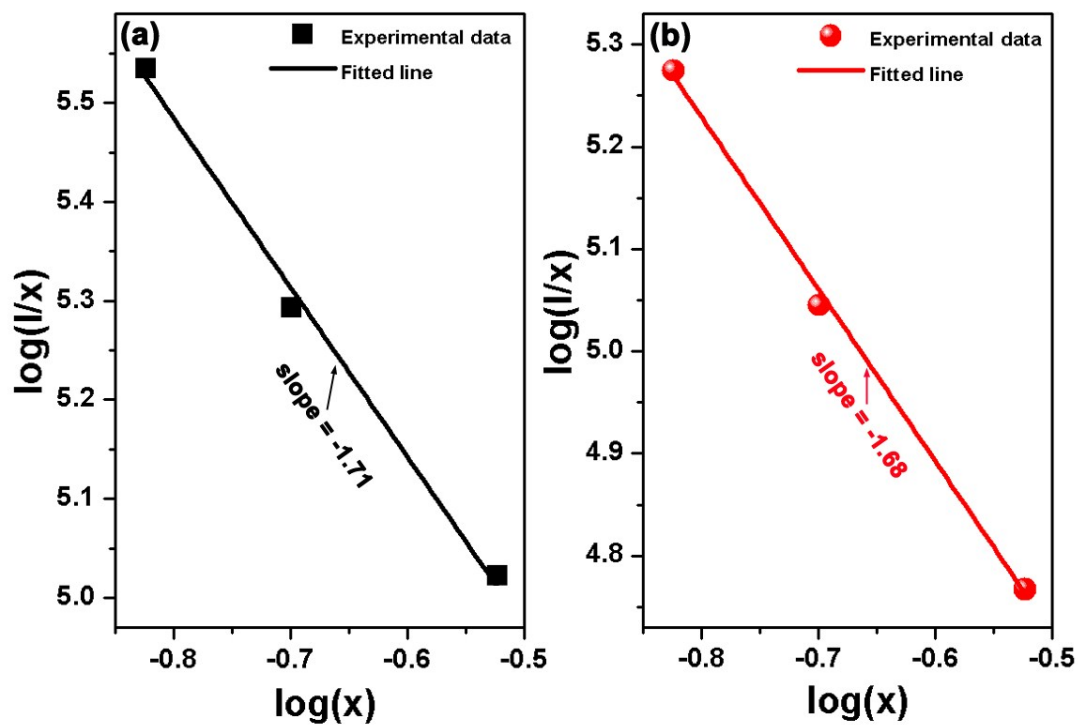

**Figure S3.** Plots of  $\log(I/x)$  vs.  $\log(x)$  for the  ${}^7F_2 \rightarrow {}^5D_0$  transition of  $\text{Eu}^{3+}$  ions in  $\text{Gd}_2\text{MoO}_6:2x\text{Eu}^{3+}$  phosphors (a) excited at 360 nm and (b) excited at 463 nm.

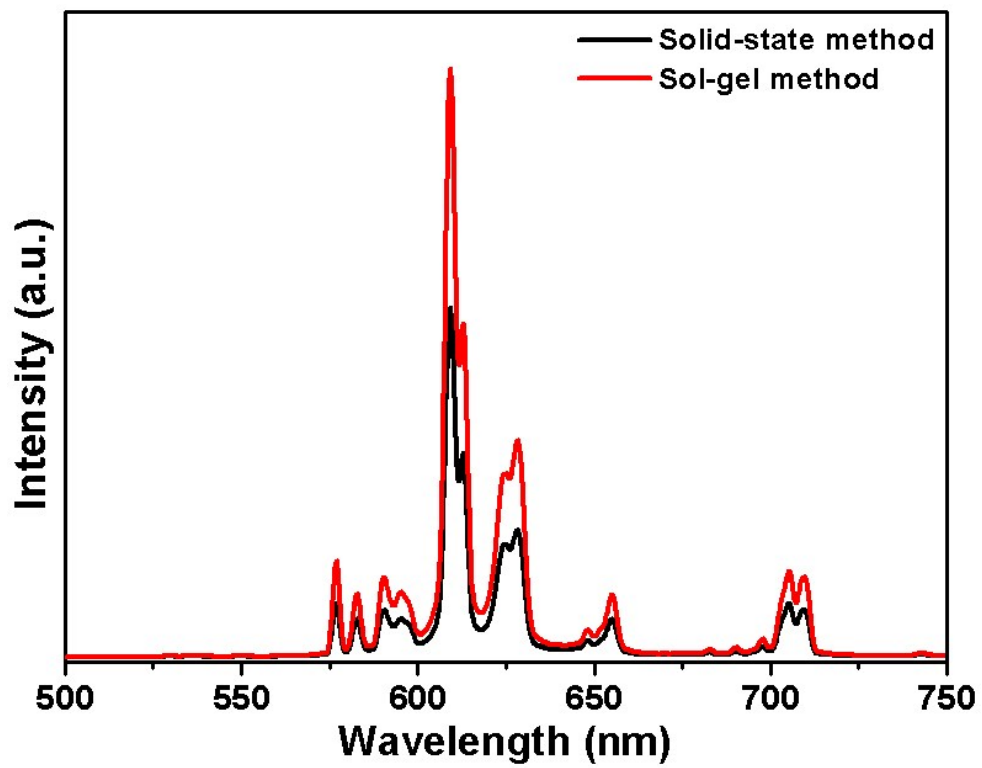

**Figure S4.** PL spectra of  $\text{Gd}_2\text{MoO}_6:0.30\text{Eu}^{3+}$  phosphors prepared by solid-state reaction method and sol-gel route under the excitation of 360 nm.

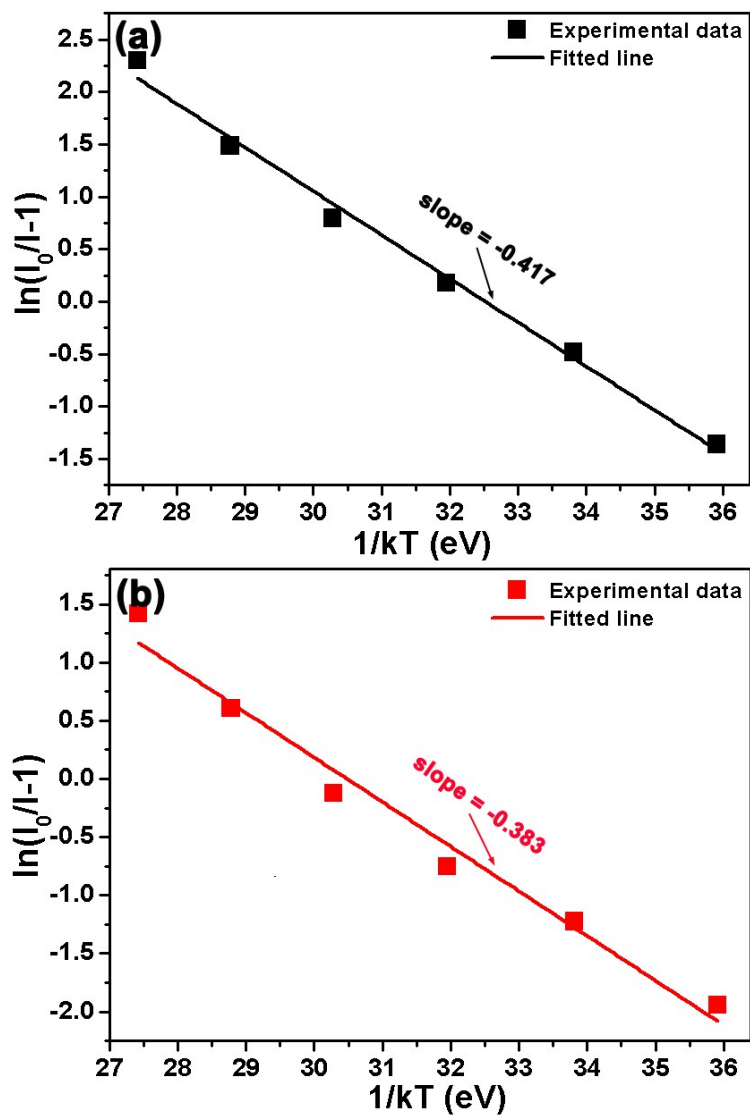

**Figure S5.** Plots of  $\ln(I_0/I-1)$  vs.  $1/T$  for the thermal quenching of the  $Gd_2MoO_6:2xEu^{3+}$  phosphors excited at (a) 360 nm and (b) 463 nm.

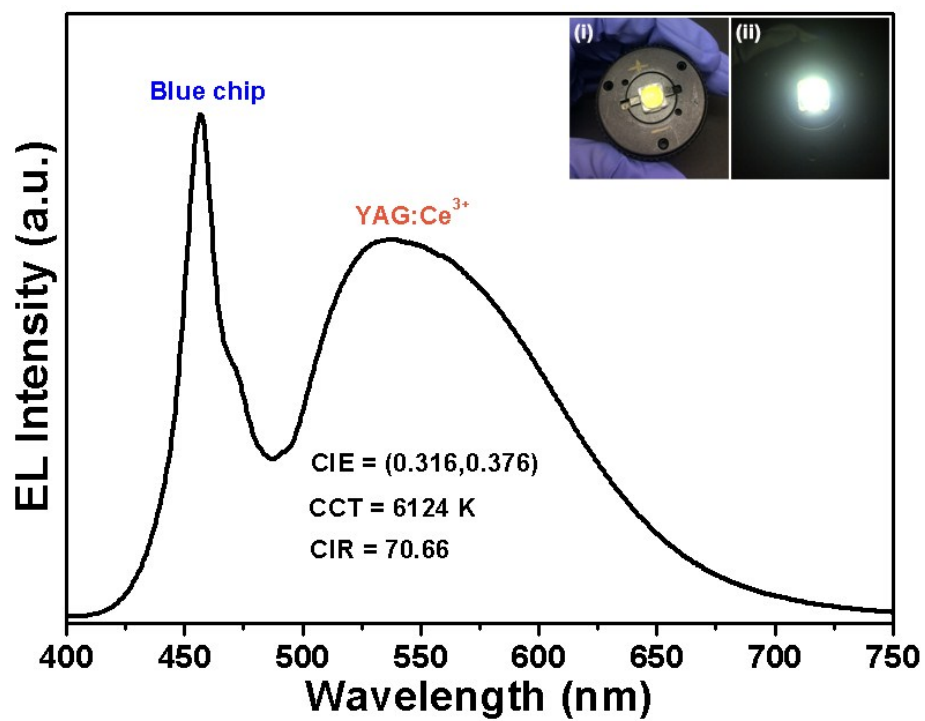

**Figure S6.** EL spectrum of fabricated WLEDs device by using the InGaN blue LED chip with commercial yellow-emitting YAG:Ce<sup>3+</sup> phosphors under 50 mA of forward bias current. Inset shows the digital images of the fabricated WLED device with and without power input.

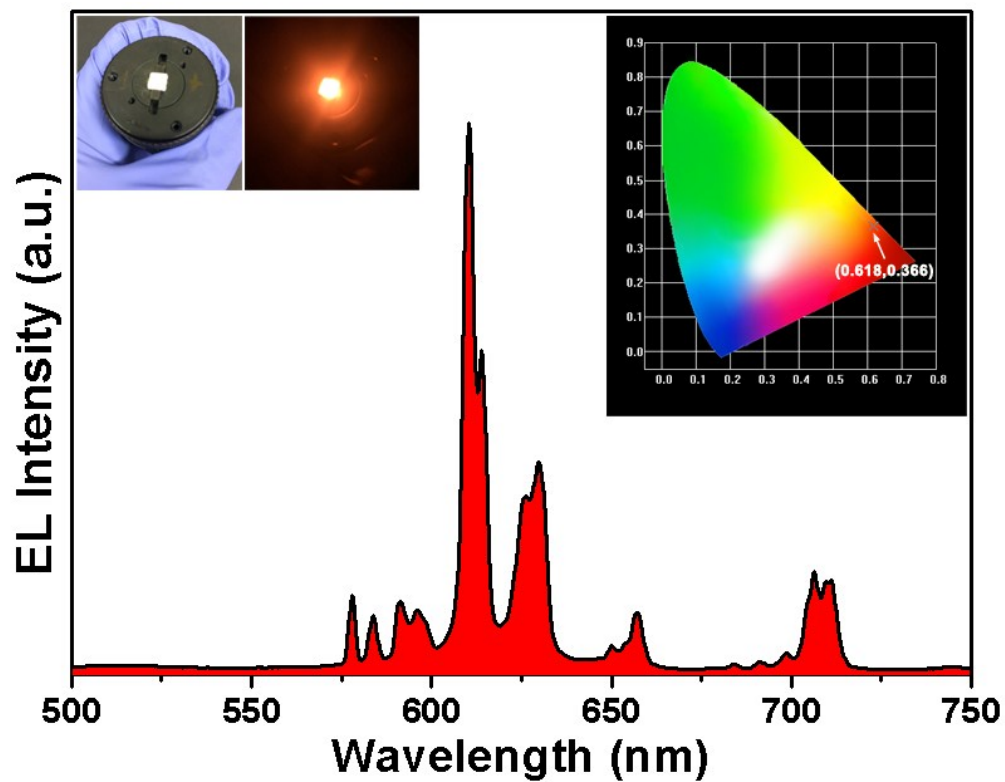

**Figure S7.** EL spectrum of red-emitting LED device utilizing the  $\text{Gd}_2\text{MoO}_6:0.30\text{Eu}^{3+}$  phosphors and 375 nm InGaN chip under 50 mA of forward bias current. Inset shows the CIE chromaticity diagram as well as the luminescent image of the fabricated device.
